# Representation Learning of Resting State fMRI with Variational Autoencoder

Jung-Hoon Kim<sup>1,3</sup>, Yizhen Zhang<sup>2</sup>, Kuan Han<sup>2</sup>, Minkyu Choi<sup>2</sup>, Zhongming Liu<sup>1,2,3,4\*</sup>

<sup>1</sup>Department of Biomedical Engineering, University of Michigan

<sup>2</sup>Department of Electrical Engineering and Computer Science, University of Michigan

<sup>3</sup>Weldon School of Biomedical Engineering, Purdue University

<sup>4</sup>School of Electrical and Computer Engineering, Purdue University

\*Correspondence

Zhongming Liu, PhD

Associate Professor

Department of Biomedical Engineering

Department of Electrical Engineering and Computer Science

University of Michigan, Ann Arbor

Email: [zmliu@umich.edu](mailto:zmliu@umich.edu)

## 20 **Abstract**

21 Resting state functional magnetic resonance imaging (rs-fMRI) data exhibits complex  
22 but structured patterns. However, the underlying origins are unclear and entangled in rs-  
23 fMRI data. Here we establish a variational auto-encoder, as a generative model  
24 trainable with unsupervised learning, to disentangle the unknown sources of rs-fMRI  
25 activity. After being trained with large data from the Human Connectome Project, the  
26 model has learned to represent and generate patterns of cortical activity and  
27 connectivity using latent variables. Of the latent representation, its distribution reveals  
28 overlapping functional networks, and its geometry is unique to each individual. Our  
29 results support the functional opposition between the default mode network and the  
30 task-positive network, while such opposition is asymmetric and non-stationary.  
31 Correlations between latent variables, rather than cortical connectivity, can be used as a  
32 more reliable feature to accurately identify subjects from a large group, even if only a  
33 short period of data is available per subject.

34

## 35 INTRODUCTION

36 The brain is active even at rest, showing complex activity patterns measurable  
37 with resting state fMRI (rs-fMRI)<sup>1</sup>. It is widely recognized that rs-fMRI activity is shaped  
38 by how the brain is wired, or the brain connectome<sup>2</sup>. Inter-regional correlations of rs-  
39 fMRI activity are often used to report functional connectivity<sup>3</sup> and map brain networks for  
40 individuals<sup>4</sup> or populations in various behavioral<sup>5</sup> or disease states<sup>6</sup>. However, it remains  
41 largely unclear where rs-fMRI activity comes from<sup>7, 8</sup>, whereas understanding the  
42 underlying origins is critical to interpretation of any rs-fMRI pattern or dynamics<sup>9</sup>.

43 Prior findings suggest a multitude of sources (or causes) for rs-fMRI activity<sup>10</sup>,  
44 including but not limited to fluctuations in neurophysiology<sup>11</sup>, arousal<sup>12</sup>, unconstrained  
45 cognition<sup>13</sup>, non-neuronal physiology<sup>14</sup>, head motion<sup>15</sup> etc. These sources only partially  
46 account for rs-fMRI activity and may be entangled not only among themselves but also  
47 with other sources that are left out simply because they are hard to specify or probe in  
48 the task-free resting state<sup>7</sup>. An inclusive study would benefit from using a data-driven  
49 approach to uncover and disentangle all plausible but hidden sources from rs-fMRI data  
50 itself, without having to presume the sources to whatever are accessible for empirical  
51 observations. To be effective, such an approach should be able to infer sources from rs-  
52 fMRI data and generate new rs-fMRI data from sources, while being able to account for  
53 complex and nonlinear relationships between the sources and the data.

54 These requirements lead us to deep learning, or representation learning with  
55 deep neural networks<sup>16</sup>. In addition to its success in artificial intelligence, deep learning  
56 has also been increasingly applied to brain research<sup>17</sup>. Despite its great potential<sup>18-20</sup>,  
57 deep learning applied to resting state fMRI analysis has arguably limited progress

58 relative to what is attainable with conventional and simpler methods<sup>21</sup>. A challenge is  
59 inherent to the absence of any task in the resting state as well as the lack of sufficient  
60 knowledge usable for training deep neural networks with supervised learning.

61 To mitigate this challenge, we chose to use Variational Auto-Encoder (VAE)<sup>22, 23</sup>,  
62 a type of deep learning model, for unsupervised learning of the ever-increasing “big  
63 data” in rs-fMRI. Briefly, we designed and trained a VAE model to represent rs-fMRI  
64 data in terms of its hidden (or latent) sources and tested its ability to explain and  
65 generate rs-fMRI data. We also explored the functional organization of rs-fMRI data in  
66 the latent space to reveal network interactions in the brain. Lastly, we tested the utility of  
67 this model for identifying individuals from their rs-fMRI data<sup>4</sup>, as a starting example of its  
68 applications.

69

## 70 **Results**

### 71 **VAE compressed rs-fMRI maps**

72 Inspired by its success in artificial intelligence<sup>22, 23</sup>, we designed a VAE model in  
73 order to disentangle the generative factors underlying rs-fMRI activity. The model used a  
74 pair of convolutional and deconvolutional neural networks in an encoder-decoder  
75 architecture (Figure 1.b). The encoder transformed any rs-fMRI pattern, formatted as an  
76 image on a regular 2D grid (Figure 1.a), to the probability distributions of 256  
77 independent latent variables. The decoder used samples of the latent variables to  
78 reconstruct or generate an fMRI map. Using data from HCP (WU-Minn HCP Quarter  
79 2)<sup>24</sup>, we first trained the model with rs-fMRI maps from 100 subjects and then tested it  
80 with rs-fMRI data from 500 other subjects.

81           After being trained, the model could compress any fMRI map to a low-  
82 dimensional latent space and restore the map from the latent representation separately  
83 for every time point (Figure 1.c). Such compression resulted in spatial blurring  
84 comparable to the effect of spatial smoothing with 4mm full width at half maximum or  
85 the effect of linear dimension reduction with principal component analysis  
86 (Supplementary Figure 1). As such, the latent representation obtained with VAE  
87 preserved the spatiotemporal characteristics of rs-fMRI, despite modest but acceptable  
88 loss in spatial resolution and specificity.

89

#### 90 **VAE synthesized correlated fMRI activity**

91           We asked whether the decoder in the VAE, as a generative model, could have  
92 learned the putative mechanisms by which rs-fMRI activity patterns arise presumably  
93 from brain networks. To address this question, we randomly sampled every latent  
94 variable from a standard normal distribution and used the decoder to synthesize 12,000  
95 rs-fMRI maps. We calculated the seed-based correlations<sup>3</sup> by using the VAE-  
96 synthesized data and compared the results with those obtained with length-matched rs-  
97 fMRI data concatenated across 10 subjects. Figure 2 shows three examples with the  
98 seed region in the primary visual cortex (V1), intraparietal sulcus (IPS), or posterior  
99 cingulate cortex (PCC). Both the synthesized and measured data gave rise to similar  
100 network patterns (mean±std of z-transformed spatial correlation  $z = 0.81 \pm 0.08$ ,  
101  $0.97 \pm 0.07$ , or  $0.88 \pm 0.05$ ), consistent with early visual network, dorsal attention network,  
102 and default mode network reported in prior studies (e.g. by Yeo et al.<sup>25</sup>). Thus, the VAE  
103 provided a computational account for the generative process of resting state activity and

104 could synthesize realistic rs-fMRI activity patterns and preserve inter-regional  
105 correlations as are observable in experiments.

106

## 107 **Clusters in latent space**

108 We further explored the utility of VAE for data-driven discovery of brain networks.  
109 We used the VAE to encode the rs-fMRI pattern observed at every time point from 500  
110 subjects, clustered the time points by applying k-means clustering (k=21) to the low-  
111 dimensional latent representations, and decoded the cluster centroids to corresponding  
112 cortical maps. Each of the resulting maps represented a characteristic pattern of  
113 network interaction (see all 21 maps in Supplementary Figure 2).

114 Among the 21 clusters, 5 clusters (Cluster 5, 6, 8, 16, 19) showed activity  
115 increase (positive) at one or multiple regions in the default mode network<sup>26-28</sup>, alongside  
116 activity decrease (negative) at other regions (Figure 3.a). Both the positive and negative  
117 regions showed a varying degree of overlapping across the 5 clusters. The overlapping  
118 positivity highlighted the default mode network and revealed sub-divisions of its  
119 constituent regions<sup>29</sup>. The overlapping negativity showed the networks presumably  
120 involved in attention<sup>30</sup>, cognitive or executive control<sup>31-33</sup>. Similarly, we found 5 clusters  
121 with activity increase in the so-called frontoparietal control network<sup>31</sup> (Cluster 10),  
122 cingulo-opercular network<sup>33</sup> (Cluster 4 and 14), cognitive control network<sup>32</sup> (Cluster 17),  
123 and dorsal attention networks<sup>34</sup> (Cluster 1) – collectively referred to as “the task positive  
124 network”<sup>35</sup> hereafter (Figure 3.b). These 5 clusters were partially overlapping with  
125 respect to their positive regions but varied from one another with respect to their  
126 negative regions, while some of them showed either no or little activity decrease. The

127 overlapping positivity and negativity showed strong co-activation of the task positive  
128 network alongside weak deactivation of the default mode network. These results  
129 indicate patterns of opposition between the default mode network and the task positive  
130 network, conceptually similar to the notion of “anti-correlation”<sup>35</sup>. Interestingly, the  
131 opposition was asymmetric, being more pronounced when activity increases in the  
132 default mode network, but much weakened when activity increases in the task positive  
133 network.

134 In addition, the other clusters were also informative (Supplementary Figure 2). To  
135 name a few examples, Cluster 21 showed activity decrease in the whole brain, thereby  
136 a signature of global signal fluctuation. Cluster 13 and 15 showed widespread  
137 synchrony across sensory systems. Cluster 7 and 9 showed the networks for  
138 sensorimotor control of the limbs and of the mouth, pharynx, and visceral organs,  
139 respectively. Whereas most clusters were bilaterally symmetric, Cluster 2 and 20 were  
140 unilateral to the right and left prefrontal cortex, respectively. Common to many clusters  
141 was the fact that a cluster could highlight the positive interactions among a set of well-  
142 defined cortical regions alongside their negative interactions with a different set of  
143 regions. These results demonstrate that VAE enables data-driven discovery of  
144 overlapping and interacting networks for functional integration, as opposed to networks  
145 that limit themselves to anatomical and functional segregation.

146

### 147 **Individual identification**

148 We further asked whether functional connectivity (FC) in the latent space could  
149 be used as a feature or “fingerprint” for identifying individuals in a population<sup>4, 36</sup>. We

150 calculated the correlation between every pair of latent variables, assembled the pair-  
151 wise FC into a FC profile, and evaluated its similarity between two separate sessions  
152 within or between subjects. For comparison, we performed similar analyses by  
153 evaluating FC between 360 cortical areas in an existing atlas<sup>37</sup>. As shown in Figure 4.a,  
154 FC between any pair of cortical areas was mostly positive (mean  $\pm$  std of z-transformed  
155 correlation:  $z=0.26\pm 0.3$ ) and highly reproducible not only within the same subject  
156 ( $r=0.66$ ) but also between different subjects ( $r=0.45$ ). On the other hand, FC between  
157 latent variables had both positive and negative values ( $z=0.00\pm 0.14$ ) and its  
158 reproducibility was high only within the same subject ( $r=0.32$ ) but not between different  
159 subjects ( $r=0.08$ ). Although less reproducible, the FC profile was more distinctive across  
160 subjects when it was evaluated between latent variables rather than cortical areas  
161 (Figure 4.b). In the latent space, the FC profile was significantly more consistent within a  
162 subject than between subjects (two-sample t-test,  $t(249,998)=235.81$ , two-sided  
163  $p<0.001$ ). The distribution of within-subject correlations was in nearly complete  
164 separation from that of between-subject correlations (Figure 4.b, bottom).

165 Then we compared the performance of individual identification on the basis of the  
166 FC profile in the latent vs. cortical space. To identify 1 out of 500 subjects, we compared  
167 a target subject's FC profile in the 1<sup>st</sup> session with every subject's FC profile in the 2<sup>nd</sup>  
168 session and chose the best match in terms of Pearson correlation coefficient. As such,  
169 the choice was correct if the correlation with the target subject was higher than the  
170 largest correlation with any non-target subject. We found that the FC profile in the  
171 cortical space could support 69.3% top-1 accuracy while identification was often done  
172 with marginal confidence relative to the decision boundary (Figure 4.c). Using the FC in



173 the latent space allowed us to reach 97.5% top-1 accuracy. The evidence for correct  
174 identification was apparent with a large margin from the decision boundary (Figure 4.d).  
175 Moreover, the use of FC in the latent space supported reliable and robust performance  
176 in top-1 identification given an increasingly larger population (Figure 4.e) or when the  
177 data were limited to a short duration (Figure 4.f), being notably superior to the use of FC  
178 in the cortical space.

179

## 180 **Discussion**

181 Here, we present a method for unsupervised representation learning of cortical  
182 rs-fMRI activity. Our results suggest that this method is able to disentangle generative  
183 factors underlying spontaneous brain activity, discover overlapping brain networks with  
184 opposing or associated functions, and capture individual characteristics or variation. We  
185 expect this method to be a valuable addition to the existing tools for investigating the  
186 origins of resting state activity, mapping functional brain networks, and potentially  
187 supporting individualized prediction of disease phenotypes and progression. Next, we  
188 discuss our findings from the joint perspective of methodology, neuroscience, and  
189 applications.

190 VAE is trainable with unsupervised learning<sup>22, 23</sup> (without any label), which is  
191 appealing for learning representations of rs-fMRI data. Since rs-fMRI measures  
192 spontaneous brain activity unconstrained by any task, labels as required for supervised  
193 learning are either unavailable or far fewer than the data itself. Unsupervised learning  
194 with VAE can leverage the ever-increasing amount of rs-fMRI data<sup>24</sup>. The latent  
195 representations extracted from VAE can serve as the input to other algorithms to further

196 support more specific goals such as classification of brain disorders and prediction of  
197 their phenotypes<sup>38, 39</sup>.

198         The method herein can be extended in multiple ways. Although it is trained with  
199 rs-fMRI data, we hypothesize that the VAE model can encode and decode both rs-fMRI  
200 and task-fMRI data but with different latent distributions. If this is true, one may use this  
201 model to classify different perceptual, behavioral, or cognitive states and to reveal the  
202 distinctive network interactions underlying various states<sup>40</sup>. The fact that the VAE can  
203 synthesize new data (Figure 2) is also appealing. It can be used as a post-processing  
204 strategy for data augmentation and interpolation, when data is short or corrupted, of  
205 interest for evaluation of dynamic functional connectivity<sup>41, 42</sup> and correction of head  
206 motion<sup>15</sup>. It also supports the notion that the learned latent space captures the origins of  
207 rs-fMRI and the VAE decoder captures the computational account for how rs-fMRI  
208 arises from its origins.

209         It is worth mentioning two limitations of the VAE model in its current form. First,  
210 the model focuses on cortical patterns but excludes sub-cortical and white-matter voxels.  
211 This design is not only for the ease of model implementation but also for the  
212 predominant role of the neocortex in brain functions<sup>43</sup>. However, this precludes the  
213 model from accounting for subcortical networks or their interactions with the cortex.  
214 Addressing this limitation awaits future studies to redesign the model as a 3-D neural  
215 network that takes volumetric fMRI data as the input. Second, the VAE model only  
216 represents spatial patterns but ignores temporal dynamics inherent to rs-fMRI data.  
217 Modeling the temporal dynamics is desirable but non-trivial, since it is highly irregular,  
218 complex and variable. To fill this gap, we direct future studies to designing a recurrent

219 neural network<sup>19, 44</sup>, as an add-on to VAE, for sequence learning based on spatial  
220 representations extracted from individual time points.

221 VAE provides a new tool for mapping overlapping functional networks in the brain.  
222 A brain region may be involved in multiple networks each supporting a distinctive  
223 function<sup>45, 46</sup>. However, existing network analyses still tend to group brain regions into  
224 non-overlapping networks<sup>25</sup>. VAE allows us to discover overlapping networks as clusters  
225 in the latent space spanned by independent latent variables. As such, VAE is  
226 conceptually similar to temporal ICA<sup>45</sup> but allows for nonlinear relationships between  
227 latent variables and the input data they represent<sup>47</sup>. Arguably, finding clusters in the low-  
228 dimensional latent space is more desirable than doing so in the higher-dimensional  
229 voxel space<sup>48</sup>. Not only is it more computationally efficient, but data representations are  
230 also more disentangled in the latent space than in the voxel space to readily reveal the  
231 underlying organization, as discussed later.

232 Clusters in the latent space do not manifest themselves as resting state  
233 networks<sup>25</sup> per se but highlight interactions among those networks. Many of the clusters  
234 cover more regions and/or reveal finer divisions within regions than are commonly  
235 observed in resting state networks (Figure 3). In each cluster, the interactions among its  
236 constituent regions should not be interpreted pairwise (e.g. correlation) but as two  
237 multivariate modes: co-activation and co-deactivation, which we interpret as the  
238 signatures of functional association and opposition, respectively.

239 Our results suggest the functional opposition between regions in the default  
240 mode network and those in cognitive control networks. This finding agrees with the prior  
241 finding that attention demanding tasks tend to increase activity in cognitive control

242 networks (also referred to as the task positive network<sup>35</sup>) and decrease activity in the  
243 default mode network<sup>26</sup>. It may sound a reminiscence of the anti-correlation between the  
244 task positive network and the default mode network<sup>35</sup>. However, the anti-correlation is  
245 controversial and confounded by global signal regression<sup>49</sup> – a questionable  
246 preprocessing step that causes spuriously negative correlations<sup>50</sup>. Note that global  
247 signal regression was not used and thereby not of concern in this study. Our finding  
248 provided complementary evidence, supporting a similar but revised view as anti-  
249 correlation<sup>35</sup>. We conclude that the functional opposition between the default mode  
250 network and the task positive network is indeed real but non-stationary<sup>41, 46</sup>. It occurs at  
251 some but not all times. It is also asymmetric in that activity increase in the default mode  
252 network tends to co-occur with activity decrease in the task positive network, whereas  
253 activity increase in the task positive network unnecessarily or less frequently co-occurs  
254 with activity decrease in the default mode network. Interestingly, the global signal  
255 fluctuation is also non-stationary and identifiable as a different cluster in the latent space.  
256 Together, the functional opposition and the global signal are separable in time; therefore,  
257 the latter does not necessarily invalidate or confound the former.

258         Central to this study is the efficacy of using VAE to disentangle what causes  
259 resting state activity. In the VAE model, the sources are the latent variables; the decoder  
260 describes how the sources generate the observed activity; the encoder models the  
261 inverse inference of the sources from the activity. Since the latent variables are data-  
262 driven, it is currently unclear how to interpret them as specific physiological processes,  
263 many of which are not observable. Nevertheless, we expect the latent variables  
264 extracted by VAE to provide the computational basis for further understanding the

265 origins of resting state activity. We hypothesize that the truly disentangled physiological  
266 origins, whether observable or not, are individually describable as the latent variables  
267 up to linear and sparse projection. This hypothesis awaits confirmation by future studies.

268 In the latent space, functional connectivity describes the correlations among the  
269 disentangled sources of resting state activity. This is a new perspective different from  
270 the functional connectivity among observable voxels, regions or networks<sup>3, 25</sup>. If the VAE  
271 model has fully disentangled the sources in a population level, functional connectivity  
272 should be near zero between different latent variables. In other words, the model sets a  
273 nearly null baseline such that the latent-space functional connectivity primarily reflects  
274 features unique to individuals. Supporting this notion, our results suggest the use of  
275 functional connectivity in the latent space leads to a significantly improved accuracy,  
276 robustness, and efficiency in individual identification, compared to the use of functional  
277 connectivity among cortical parcels<sup>4, 36</sup>. Note that our main purpose is not to push for a  
278 higher identification accuracy but to understand the distribution and geometry of data  
279 representations in the feature space. Therefore, we opt for minimal preprocessing and  
280 the simplest strategy for individual identification. There is room for methodological  
281 development to further improve the identification accuracy or to extend it for many other  
282 tasks, including classification of the gender or disease states, prediction of behavioral  
283 and cognitive performances, to name a few examples. We expect that such applications  
284 would be fruitful and potentially impactful to cognitive sciences and clinical applications.

285

## 286 **Methods**

### 287 **Data**

288 We used rs-fMRI data from 602 healthy subjects randomly chosen from the Q2  
289 release by HCP<sup>24</sup>. For each subject, we used two sessions of rs-fMRI data acquired  
290 from different days with either right-to-left or left-to-right phase encoding. Each session  
291 included 1,200 time points separated by 0.72s. Following minimal preprocessing<sup>51</sup>, we  
292 applied voxel-wise detrending (regressing out a 3<sup>rd</sup>-order polynomial function),  
293 bandpass filtering (from 0.01 to 0.1 Hz), and normalization (to zero mean and unitary  
294 variance). We further separated the data into three sets, including 100, 2, or 500  
295 subjects for training, validating, or testing the VAE model, respectively.

296

### 297 **Geometric reformatting**

298 We converted the rs-fMRI data from 3-D cortical surfaces to 2-D grids in order to  
299 structure the rs-fMRI pattern as an image to ease the application of convolutional neural  
300 networks. As illustrated in Figure 1.a, we inflated each hemisphere to a sphere by using  
301 FreeSurfer<sup>52</sup>. For each location on the spherical surface, we used `cart2sph.m` in  
302 MATLAB to convert its cartesian coordinates  $(x, y, z)$  to spherical coordinates  $(a, e)$   
303 reporting the azimuth and elevation angles in a range from  $-\pi$  to  $\pi$  and from  $-\pi/2$  to  
304  $\pi/2$ , respectively. We defined a 192x192 grid to resample the spherical surface with  
305 respect to azimuth and  $\sin(\text{elevation})$  such that the sampled locations were uniformly  
306 distributed at approximation (Supplementary Figure 3). We used the nearest-neighbor  
307 interpolation to convert data from the 3-D surface to the 2-D grid, and vice versa.

308

### 309 **Variational autoencoder**

310 We designed a  $\beta$ -VAE model<sup>23</sup>, a variation of VAE<sup>22</sup>, to learn representations of

311 rs-fMRI spatial patterns. This model included an encoder and a decoder (Figure 1.b).  
312 The encoder converted an fMRI map to a probabilistic distribution of 256 latent variables.  
313 The decoder sampled the latent distribution to reconstruct the input fMRI map or  
314 generate a new map. The encoder stacked five convolutional layers and one fully  
315 connected layer. Every convolutional layer applied linear convolution and rectified its  
316 output<sup>53</sup>. The 1<sup>st</sup> layer applied 8x8 convolution separately to the input from each  
317 hemisphere and concatenated its output. The 2<sup>nd</sup> through 5<sup>th</sup> layers applied 4x4  
318 convolution. The fully connected layer applied linear weighting and yielded the mean  
319 and standard deviation that described the normal distribution of each latent variable.  
320 The decoder used nearly the same architecture as the encoder but connected the  
321 layers in the reverse order for transformation from the latent space to the input space.  
322 See Figure 1.b for more details about the architecture.

323 We trained the VAE model to reconstruct input while constraining the distribution  
324 of every latent variable to be close to an independent and standard normal distribution.  
325 Specifically, using the training data, we optimized the encoding parameters,  $\phi$ , and the  
326 decoding parameters,  $\theta$ , to minimize the loss function as below.

$$327 \quad L(\phi, \theta|x) = \|x - x'\|_2^2 + \beta \cdot D_{KL}[\mathcal{N}(\mu_z, \sigma_z) \parallel \mathcal{N}(\mathbf{0}, \mathbf{I})] \quad (1)$$

328 where  $x$  is the input data combined across the left and right hemispheres,  $x'$  is the  
329 corresponding output from the model,  $\mathcal{N}(\mu_z, \sigma_z)$  is the posterior normal distribution of  
330 the latent variables,  $z$ , with their mean and standard deviation denoted as  $\mu_z$  and  $\sigma_z$ ,  
331  $\mathcal{N}(\mathbf{0}, \mathbf{I})$  is an independent and standard normal distribution as the prior distribution of  
332 the latent variables,  $D_{KL}$  measures the Kullback-Leibler divergence between the  
333 posterior and prior distributions, and  $\beta$  is the hyperparameter balancing the two terms in

334 the loss function. We optimized the model by using stochastic gradient descent (batch  
335 size=128, learning rate= $10^{-5}$ , and 500 epochs) and Adam optimizer<sup>54</sup> implemented in  
336 PyTorch (v1.2.0). We explored four values (1, 2, 5, 10) for  $\beta$  and chose  $\beta = 5$  to  
337 disentangle the latent variables while minimizing the loss function in training and  
338 validation (Supplementary Figure 4).

339

### 340 **Synthesizing rs-fMRI functional connectivity**

341 We used the trained VAE to synthesize rs-fMRI data from random samples of  
342 latent variables. To synthesize a vector in the latent space, we drew a random sample of  
343 every latent variable independently from a standard normal distribution. The  
344 synthesized vector passed through the decoder in VAE, generating a cortical pattern.  
345 Repeating this process, we synthesized 12,000 cortical patterns as data used for seed-  
346 based correlation analysis. As examples, we explored three seed locations within V1,  
347 IPS, and PCC and calculated the functional connectivity to each seed based on the  
348 Pearson correlation coefficient. The MNI coordinates of the seed in V1, IPS, and PCC  
349 were (7, -83, 2), (26, -66, 48), and (0, 57, 27), respectively<sup>55</sup>. For comparison, we  
350 evaluated seed-based correlations with length-matched experimental rs-fMRI data  
351 concatenated across 10 subjects in HCP. We evaluated the reproducibility of the results  
352 by repeating the above analysis 20 times with different synthesized data and the  
353 experimental data from different subsets of subjects.

354

### 355 **Clustering in the latent space**

356 We encoded the rs-fMRI spatial pattern at every time point for 500 testing



357 subjects, yielding 600,000 vectors in the latent space. We used k-means clustering (with  
358 Euclidean distance) to group those vectors to 21 clusters. The choice of  $k=21$  was made  
359 empirically in part to be consistent to a prior study with a similar motivation<sup>45</sup> and in part  
360 to fall within the range of the number of resting state networks reported in literature. For  
361 each of the 21 clusters, the cluster centroid was calculated and converted to a  
362 corresponding cortical pattern by using the VAE's decoder; the resulting cortical pattern  
363 was scaled such that its maximal absolute value equaled 1.

364 To evaluate the spatial overlap among clusters, we thresholded the cortical  
365 pattern resulting from each cluster by  $>0.35$  (for positivity) or  $<-0.35$  (for negativity). For  
366 clusters relevant to the default mode network (5, 19, 8, 6, 16) or the task positive  
367 network (17, 1, 14, 4, 10), we calculated the overlapping positivity (or negativity) by  
368 counting the number of times that each cortical location was over (or below) 0.35 (or -  
369 0.35)

370

### 371 **Individual identification**

372 In the testing data set, every individual had rs-fMRI data acquired for two  
373 separate sessions. For each session, we encoded the data as (256×1,200) latent  
374 representations, calculated the z-transformed correlation between every pair of latent  
375 variables, and stored the z-values into a vector, referred to as the FC profile in the latent  
376 space.

377 We tested the utility of this FC profile as the feature for identifying individuals in a  
378 population ( $n=500$ ). For every subject, we used the FC profile collected in one session  
379 as the subject-identifying key in a database. Given this database, we tested the

380 accuracy of retrieving any subject's identity by using a query based on the subject's FC  
381 profile in the other session. To retrieve the identity, we compared the query to every key  
382 to find the best match in terms of the highest correlation. We evaluated the identification  
383 accuracy as the percentage by which the correct identity was retrieved. Since we could  
384 use either session 1 or session 2 for the key while using the other for the query, we  
385 tested both cases and averaged the identification accuracy.

386 For comparison, we also evaluated the functional connectivity between every pair  
387 of 360 cortical parcels defined in an established atlas<sup>37</sup>. Similarly, we used the FC  
388 profile in the cortical space as the feature for individual identification and compared the  
389 resulting identification accuracy with that based on the FC profile in the latent space.  
390 We repeated this comparative evaluation with a varying population size (from n=5 to  
391 500) or a varying length of data (from 9 to 180 s). We repeated the above analysis 100  
392 times, each time with a different subset of the testing data and averaged the  
393 identification accuracy across the repeated tests.

394

395

396

## 397 Reference

- 398 1. Fox, M.D. & Raichle, M.E. Spontaneous fluctuations in brain activity observed  
399 with functional magnetic resonance imaging. *Nature reviews neuroscience* **8**, 700-711  
400 (2007).
- 401 2. Sporns, O., Tononi, G. & Kötter, R. The human connectome: a structural  
402 description of the human brain. *PLoS computational biology* **1** (2005).
- 403 3. Biswal, B., Zerrin Yetkin, F., Haughton, V.M. & Hyde, J.S. Functional connectivity  
404 in the motor cortex of resting human brain using echo-planar MRI. *Magnetic resonance*  
405 *in medicine* **34**, 537-541 (1995).
- 406 4. Finn, E.S., *et al.* Functional connectome fingerprinting: identifying individuals  
407 using patterns of brain connectivity. *Nature neuroscience* **18**, 1664 (2015).
- 408 5. Smith, S.M., *et al.* Correspondence of the brain's functional architecture during  
409 activation and rest. *Proceedings of the National Academy of Sciences* **106**, 13040-  
410 13045 (2009).
- 411 6. Fox, M.D., *et al.* Resting-state networks link invasive and noninvasive brain  
412 stimulation across diverse psychiatric and neurological diseases. *Proceedings of the*  
413 *National Academy of Sciences* **111**, E4367-E4375 (2014).
- 414 7. Leopold, D.A. & Maier, A. Ongoing physiological processes in the cerebral cortex.  
415 *Neuroimage* **62**, 2190-2200 (2012).
- 416 8. Lu, H., Jaime, S. & Yang, Y. Origins of the resting-state functional MRI signal:  
417 potential limitations of the “neurocentric” model. *Frontiers in neuroscience* **13** (2019).
- 418 9. Winder, A.T., Echagarruga, C., Zhang, Q. & Drew, P.J. Weak correlations  
419 between hemodynamic signals and ongoing neural activity during the resting state.  
420 *Nature neuroscience* **20**, 1761-1769 (2017).
- 421 10. Bianciardi, M., *et al.* Sources of functional magnetic resonance imaging signal  
422 fluctuations in the human brain at rest: a 7 T study. *Magnetic resonance imaging* **27**,  
423 1019-1029 (2009).
- 424 11. Mantini, D., Perrucci, M.G., Del Gratta, C., Romani, G.L. & Corbetta, M.  
425 Electrophysiological signatures of resting state networks in the human brain.  
426 *Proceedings of the National Academy of Sciences* **104**, 13170-13175 (2007).
- 427 12. Chang, C., *et al.* Tracking brain arousal fluctuations with fMRI. *Proceedings of*

- 428 *the National Academy of Sciences* **113**, 4518-4523 (2016).
- 429 13. Chou, Y.-h., *et al.* Maintenance and representation of mind wandering during  
430 Resting-State fMRI. *Scientific reports* **7**, 40722 (2017).
- 431 14. Birn, R.M., Smith, M.A., Jones, T.B. & Bandettini, P.A. The respiration response  
432 function: the temporal dynamics of fMRI signal fluctuations related to changes in  
433 respiration. *Neuroimage* **40**, 644-654 (2008).
- 434 15. Power, J.D., *et al.* Methods to detect, characterize, and remove motion artifact in  
435 resting state fMRI. *Neuroimage* **84**, 320-341 (2014).
- 436 16. LeCun, Y., Bengio, Y. & Hinton, G. Deep learning. *nature* **521**, 436-444 (2015).
- 437 17. Richards, B.A., *et al.* A deep learning framework for neuroscience. *Nature*  
438 *neuroscience* **22**, 1761-1770 (2019).
- 439 18. Suk, H.-I., Wee, C.-Y., Lee, S.-W. & Shen, D. State-space model with deep  
440 learning for functional dynamics estimation in resting-state fMRI. *NeuroImage* **129**, 292-  
441 307 (2016).
- 442 19. Chen, S. & Hu, X. Individual identification using the functional brain fingerprint  
443 detected by the recurrent neural network. *Brain connectivity* **8**, 197-204 (2018).
- 444 20. Plis, S.M., *et al.* Deep learning for neuroimaging: a validation study. *Frontiers in*  
445 *neuroscience* **8**, 229 (2014).
- 446 21. He, T., *et al.* Deep neural networks and kernel regression achieve comparable  
447 accuracies for functional connectivity prediction of behavior and demographics.  
448 *NeuroImage* **206**, 116276 (2020).
- 449 22. Kingma, D.P. & Welling, M. Auto-encoding variational bayes. *arXiv preprint*  
450 *arXiv:1312.6114* (2013).
- 451 23. Higgins, I., *et al.* beta-VAE: Learning Basic Visual Concepts with a Constrained  
452 Variational Framework. *Iclr* **2**, 6 (2017).
- 453 24. Van Essen, D.C., *et al.* The WU-Minn human connectome project: an overview.  
454 *Neuroimage* **80**, 62-79 (2013).
- 455 25. Thomas Yeo, B., *et al.* The organization of the human cerebral cortex estimated  
456 by intrinsic functional connectivity. *Journal of neurophysiology* **106**, 1125-1165 (2011).
- 457 26. Raichle, M.E., *et al.* A default mode of brain function. *Proceedings of the National*  
458 *Academy of Sciences* **98**, 676-682 (2001).

- 459 27. Buckner, R.L., Andrews-Hanna, J.R. & Schacter, D.L. The brain's default network:  
460 anatomy, function, and relevance to disease. (2008).
- 461 28. Greicius, M.D., Krasnow, B., Reiss, A.L. & Menon, V. Functional connectivity in  
462 the resting brain: a network analysis of the default mode hypothesis. *Proceedings of the*  
463 *National Academy of Sciences* **100**, 253-258 (2003).
- 464 29. Andrews-Hanna, J.R., Reidler, J.S., Sepulcre, J., Poulin, R. & Buckner, R.L.  
465 Functional-anatomic fractionation of the brain's default network. *Neuron* **65**, 550-562  
466 (2010).
- 467 30. Corbetta, M. & Shulman, G.L. Control of goal-directed and stimulus-driven  
468 attention in the brain. *Nature reviews neuroscience* **3**, 201-215 (2002).
- 469 31. Dixon, M.L., *et al.* Heterogeneity within the frontoparietal control network and its  
470 relationship to the default and dorsal attention networks. *Proceedings of the National*  
471 *Academy of Sciences* **115**, E1598-E1607 (2018).
- 472 32. Cole, M.W. & Schneider, W. The cognitive control network: integrated cortical  
473 regions with dissociable functions. *Neuroimage* **37**, 343-360 (2007).
- 474 33. Dosenbach, N.U., *et al.* Distinct brain networks for adaptive and stable task  
475 control in humans. *Proceedings of the National Academy of Sciences* **104**, 11073-11078  
476 (2007).
- 477 34. Fox, M.D., Corbetta, M., Snyder, A.Z., Vincent, J.L. & Raichle, M.E. Spontaneous  
478 neuronal activity distinguishes human dorsal and ventral attention systems.  
479 *Proceedings of the National Academy of Sciences* **103**, 10046-10051 (2006).
- 480 35. Fox, M.D., *et al.* The human brain is intrinsically organized into dynamic,  
481 anticorrelated functional networks. *Proceedings of the National Academy of Sciences*  
482 **102**, 9673-9678 (2005).
- 483 36. Venkatesh, M., Jaja, J. & Pessoa, L. Comparing functional connectivity matrices:  
484 A geometry-aware approach applied to participant identification. *NeuroImage* **207**,  
485 116398 (2020).
- 486 37. Glasser, M.F., *et al.* A multi-modal parcellation of human cerebral cortex. *Nature*  
487 **536**, 171-178 (2016).
- 488 38. Garrity, A.G., *et al.* Aberrant "default mode" functional connectivity in  
489 schizophrenia. *American journal of psychiatry* **164**, 450-457 (2007).

- 490 39. Zhang, D., *et al.* Multimodal classification of Alzheimer's disease and mild  
491 cognitive impairment. *Neuroimage* **55**, 856-867 (2011).
- 492 40. Gonzalez-Castillo, J., *et al.* Tracking ongoing cognition in individuals using brief,  
493 whole-brain functional connectivity patterns. *Proceedings of the National Academy of*  
494 *Sciences* **112**, 8762-8767 (2015).
- 495 41. Chang, C. & Glover, G.H. Time–frequency dynamics of resting-state brain  
496 connectivity measured with fMRI. *Neuroimage* **50**, 81-98 (2010).
- 497 42. Allen, E.A., *et al.* Tracking whole-brain connectivity dynamics in the resting state.  
498 *Cerebral cortex* **24**, 663-676 (2014).
- 499 43. Rakic, P. Evolution of the neocortex: a perspective from developmental biology.  
500 *Nature Reviews Neuroscience* **10**, 724-735 (2009).
- 501 44. Sutskever, I., Vinyals, O. & Le, Q.V. Sequence to sequence learning with neural  
502 networks. in *Advances in neural information processing systems* 3104-3112 (2014).
- 503 45. Smith, S.M., *et al.* Temporally-independent functional modes of spontaneous  
504 brain activity. *Proceedings of the National Academy of Sciences* **109**, 3131-3136 (2012).
- 505 46. Liu, X. & Duyn, J.H. Time-varying functional network information extracted from  
506 brief instances of spontaneous brain activity. *Proceedings of the National Academy of*  
507 *Sciences* **110**, 4392-4397 (2013).
- 508 47. Khemakhem, I., Kingma, D.P. & Hyvärinen, A. Variational autoencoders and  
509 nonlinear ica: A unifying framework. *arXiv preprint arXiv:1907.04809* (2019).
- 510 48. Liu, X., Chang, C. & Duyn, J.H. Decomposition of spontaneous brain activity into  
511 distinct fMRI co-activation patterns. *Frontiers in systems neuroscience* **7**, 101 (2013).
- 512 49. Liu, T.T., Nalci, A. & Falahpour, M. The global signal in fMRI: Nuisance or  
513 Information? *Neuroimage* **150**, 213-229 (2017).
- 514 50. Murphy, K., Birn, R.M., Handwerker, D.A., Jones, T.B. & Bandettini, P.A. The  
515 impact of global signal regression on resting state correlations: are anti-correlated  
516 networks introduced? *Neuroimage* **44**, 893-905 (2009).
- 517 51. Glasser, M.F., *et al.* The minimal preprocessing pipelines for the Human  
518 Connectome Project. *Neuroimage* **80**, 105-124 (2013).
- 519 52. Fischl, B. FreeSurfer. *Neuroimage* **62**, 774-781 (2012).
- 520 53. Nair, V. & Hinton, G.E. Rectified linear units improve restricted boltzmann

521 machines. in *Proceedings of the 27th international conference on machine learning*  
522 (*ICML-10*) 807-814 (2010).

523 54. Kingma, D.P. & Ba, J. Adam: A method for stochastic optimization. *arXiv preprint*  
524 *arXiv:1412.6980* (2014).

525 55. Jarrett, C. The restless brain. *The Psychologist* (2009).

526

527

528

529

530

531

532

533

534

535

536

537

538

539

540

541

542

543

544

545

546

547

548

549

550

551

552

553

554

555

556

557

558

559

560

561

562

563

564  
565  
566  
567  
568  
569

## Figures

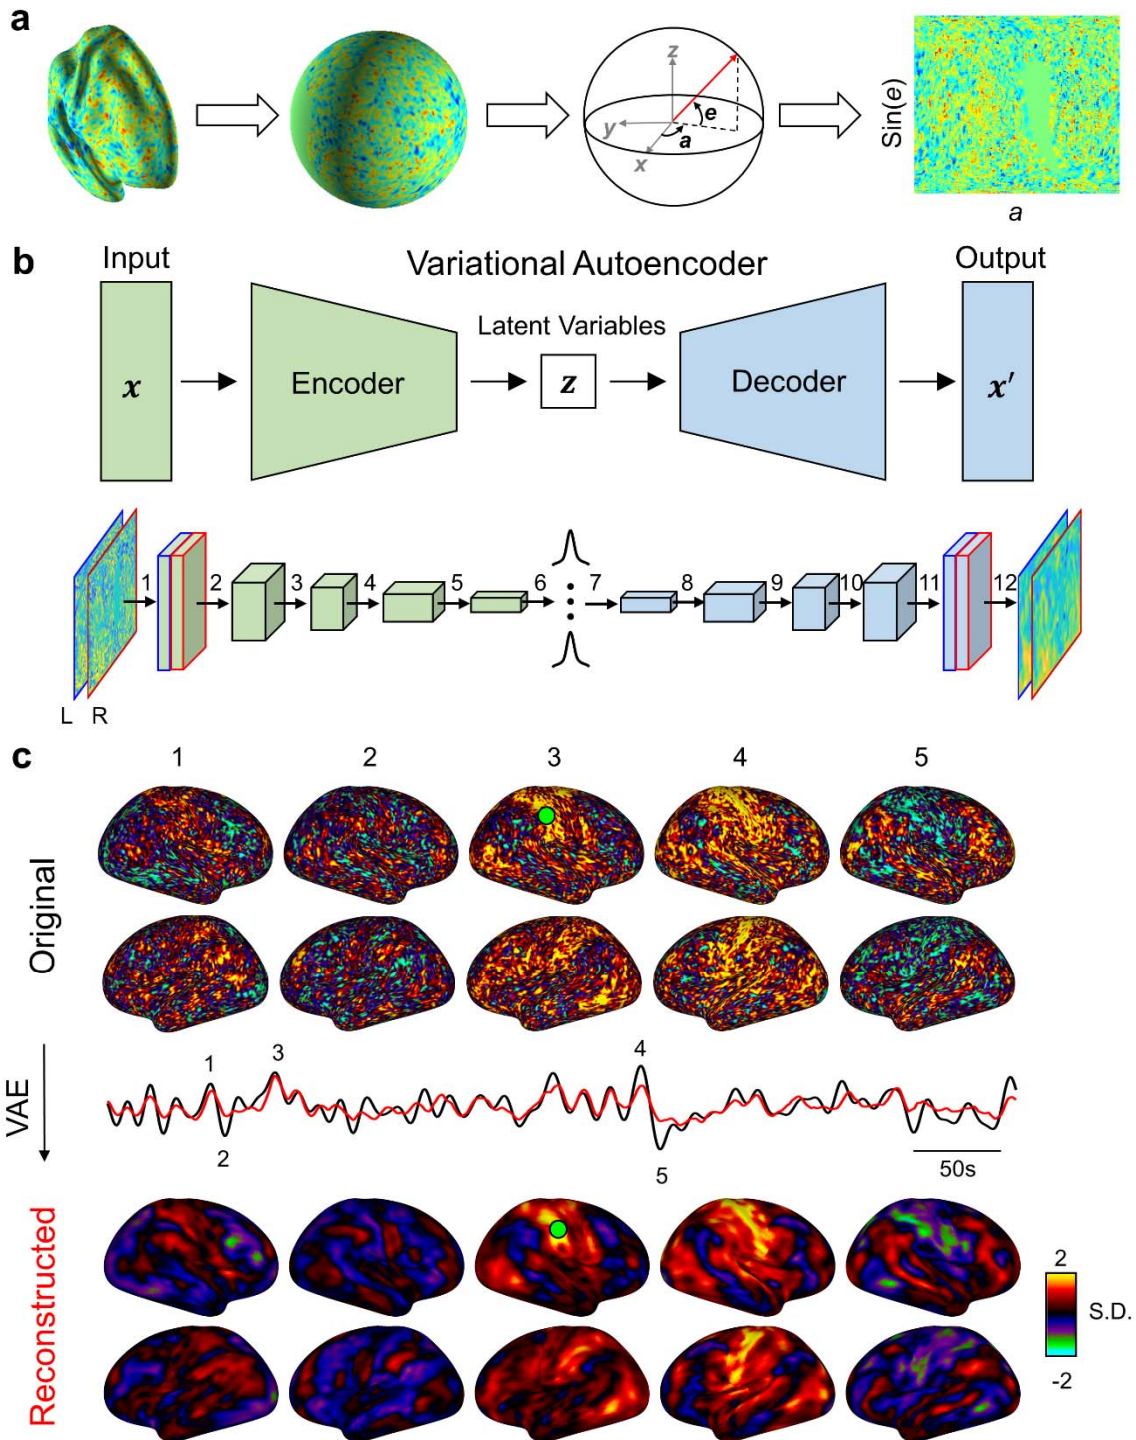

570



571 **Figure 1. Variational Auto-Encoder (VAE). (a) Geometric reformatting.** The cortical  
572 distribution of fMRI activity is converted onto a spherical surface and then to an image  
573 by evenly resampling the spherical surface with respect to  $\sin(e)$  and  $a$ , where  $e$  and  $a$   
574 are elevation and azimuth, respectively. **(b) Encoder-decoder architecture.** The  
575 encoder and the decoder each contain 5 convolutional layers connected in series. In the  
576 encoder, each convolutional layer (numbered from 1 to 5) outputs a feature map with  
577 the size of  $96 \times 96 \times 64$ ,  $48 \times 48 \times 128$ ,  $24 \times 24 \times 128$ ,  $12 \times 12 \times 256$ , or  $6 \times 6 \times 256$ , respectively. In  
578 the decoder, each convolutional layer (numbered from 8 to 12) outputs a feature map  
579 with a size of  $6 \times 6 \times 256$ ,  $12 \times 12 \times 256$ ,  $24 \times 24 \times 128$ ,  $48 \times 48 \times 128$ , or  $96 \times 96 \times 64$ , respectively.  
580 The operation at each layer is specified as follows. 1: convolution (kernel size=8,  
581 stride=2, padding=3) and rectified nonlinearity; 2-5: convolution (kernel size=4, stride=2,  
582 padding=1) and rectified nonlinearity; 6: fully-connected layer and re-parameterization; 7:  
583 fully-connected layer and rectified nonlinearity; 8-11: transposed convolution (kernel  
584 size=4, stride=2, padding=1) and rectified nonlinearity; 12: transposed convolution  
585 (kernel size=8, stride=2, padding=3). Blue and red boundaries highlight the input/out  
586 images for the left and right hemispheres, respectively. **(c) Reconstruction of rs-fMRI.**  
587 For a typical rs-fMRI dataset, the activity patterns observed are shown in the top and  
588 their reconstructions through VAE are shown in the bottom. The observed and  
589 reconstructed patterns correspond to 5 time points as shown in the voxel time series  
590 from the intra-parietal sulcus. The time series of the observed and reconstructed activity  
591 are shown in black and red, respectively.

592

593

594

595

596

597

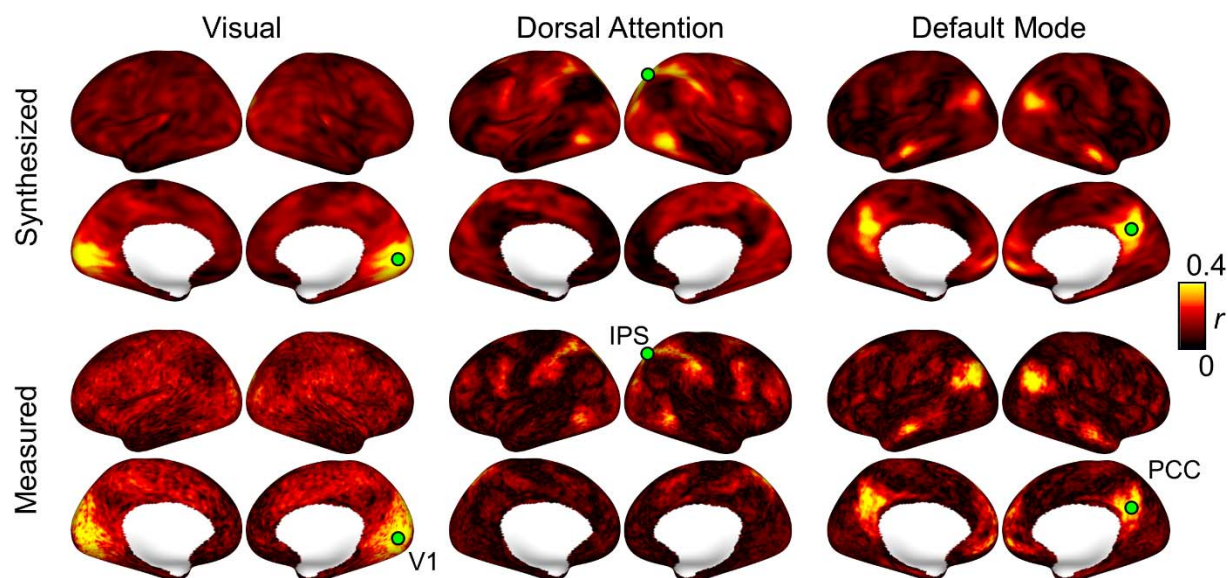

598

599

**Figure 2. Synthesis of correlated rs-fMRI activity.** Seed-based correlations based on

600 VAE-synthesized (upper panel) and experimentally measured (lower panel) rs-fMRI data

601 given three seed locations in the primary visual cortex, intra-parietal sulcus and

602 posterior cingulate cortex, as example locations in the visual network, dorsal attention

603 network, and default-mode network, respectively. The color indicates the correlation

604 coefficient.

605

606

607

608

609

610  
611  
612  
613  
614

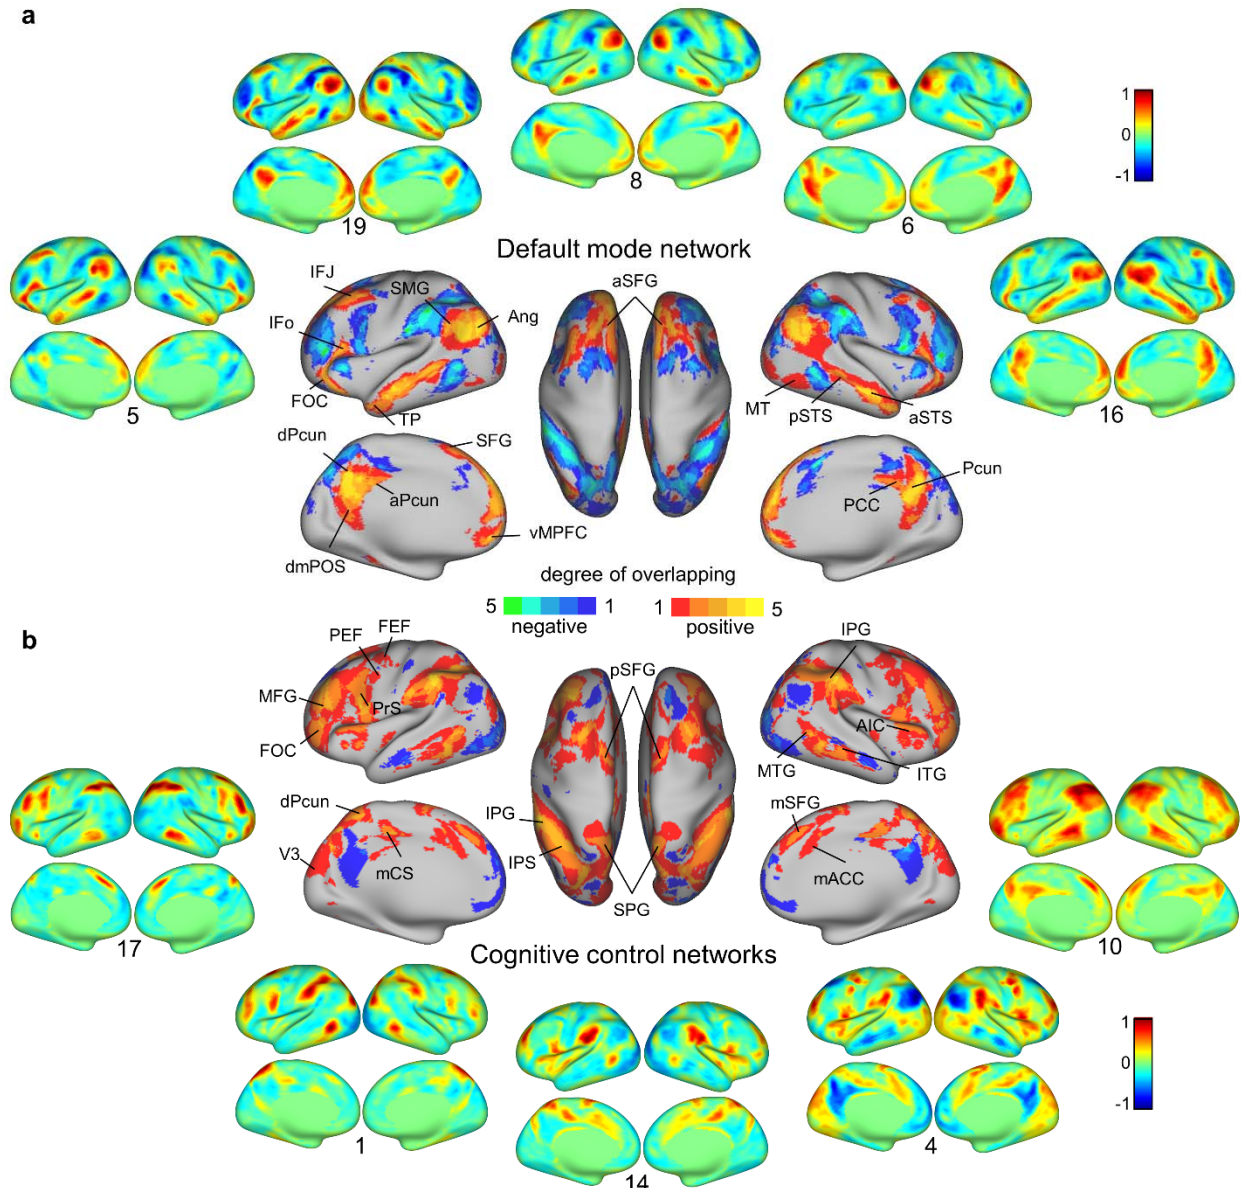

615

616 **Figure 3. Latent-space clusters related to the default-mode network (DMN) and**

617 **the task positive network (TPN). (a) Five clusters (#5, 19, 8, 6, 16) project onto**

618 cortical patterns with positivity in one or multiple regions of DMN. Each pattern is shown  
619 as a map normalized to [-1, 1] (or divided by the maximum of the absolute voxel value).  
620 The cortical locations with values >0.35 or <-0.35 are labeled as “positive” or “negative”,  
621 respectively. For each location, the number of times it appears “positive” (or “negative”)  
622 is displayed as red to yellow (or blue to green) to show the degree of overlapping  
623 positivity (or negativity) across the five clusters. **(b)** Similarly, five clusters project onto  
624 positive patterns in TPN, including the cognitive control network (#17), attention network  
625 (#1), cingulo-opercular network (#14, 4), frontoparietal control network (#10). The  
626 degree of overlapping positivity (or negativity) is evaluated and displayed in the same  
627 way as (a). IFJ: inferior frontal junction, SMG: supramarginal gyrus, IFo: inferior frontal  
628 gyrus (pars opercularis), Pcun: precuneus, pSTS: posterior superior temporal sulcus,  
629 TP: temporal pole, SFG: superior temporal gyrus, FOC: frontal orbital cortex, dmPOS:  
630 dorsomeidal parietooccipital sulcus, IPG: inferior parietal gyrus, MTG: middle temporal  
631 gyrus, MFG: middle frontal gyrus, Ang: Angular gyrus, PrS: precentral sulcus, IPS:  
632 intraparietal sulcus, ITG : inferior temporal gyrus, IFt: inferior frontal gyrus (pars  
633 triangularis), AIC: anterior insular cortex, IFS: inferior frontal sulcus, PHT: Area PHT,  
634 SPG: superior parietal gyrus, mCS: margin of the cingulate sulcus, FEF: frontal eye field,  
635 PEF: parietal eye field.

636

637

638

639

640

641

642

643

644

645

646

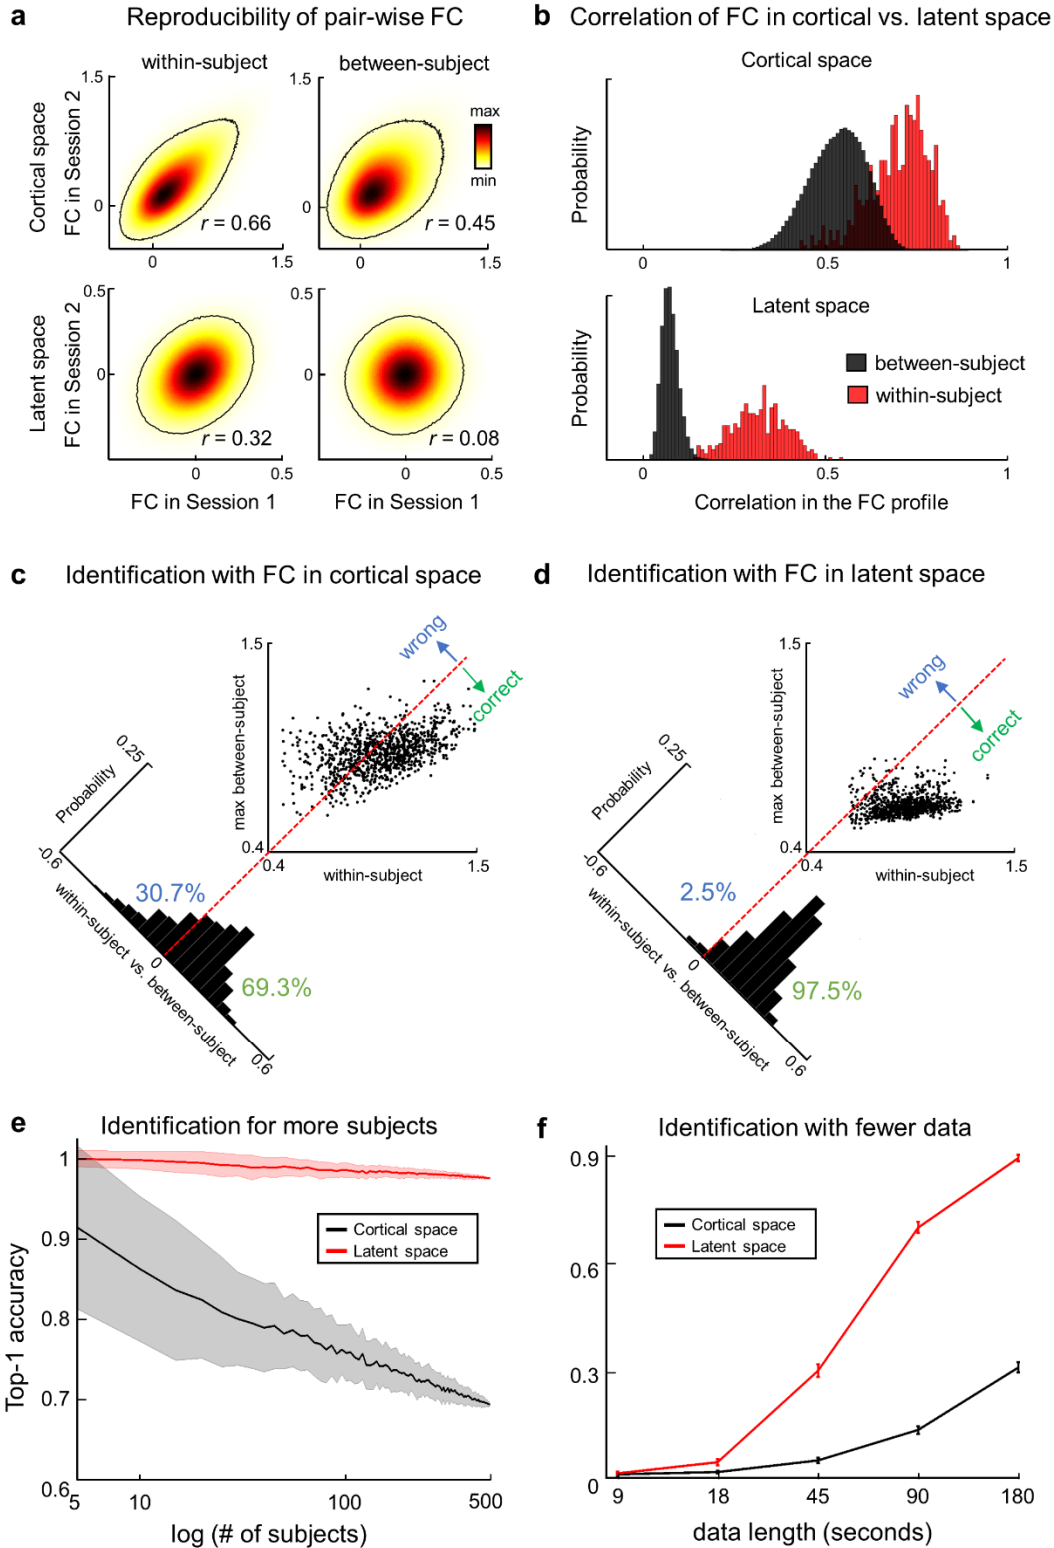

647

648 **Figure 4. Individual identification based on correlations between latent variables**

649 **or cortical parcels. (a)** Density distributions of z-transformed correlations between

650 every pair of cortical parcels (top) or latent variables (bottom). For each pair, the  
651 correlation in one session is plotted against the corresponding correlation in the other  
652 session for the same subject (within-subject, left) or different subjects (between-subject,  
653 right) given the testing dataset with  $n=500$  subjects. **(b)** Within-subject (red) and  
654 between-subject (black) correlations in the FC among cortical parcels (top) or latent  
655 variables (bottom) are shown as histograms with the width of each bin at 0.01. **(c)** In the  
656 scatter plot, each dot indicates one subject, plotting the maximal correlation in the  
657 cortical FC profile between that subject and a different subject against the  
658 corresponding correlation within that subject. The red-dashed line indicates  $y=x$ , serving  
659 as a decision boundary, across which identification is correct ( $x>y$ ) or wrong ( $y>x$ ). The  
660 histogram shows the distribution of  $y-x$  (0.05 bin width) with the decision boundary  
661 corresponding to 0. Similarly, **(d)** presents the results obtained with latent-space FC in  
662 the same format as **(c)**. **(e)** Top-1 identification accuracy evaluated with an increasing  
663 number of subjects ( $n=5$  to 500) given the latent-space (red) or cortical-space (black)  
664 FC profile. The solid line and the shade indicate the mean and the standard deviation of  
665 the results with different testing data. **(f)** Top-1 identification accuracy given rs-fMRI data  
666 of different lengths (from 9s to 180s). The line and the error bar indicate the mean and  
667 the standard deviation with different testing data.  
668

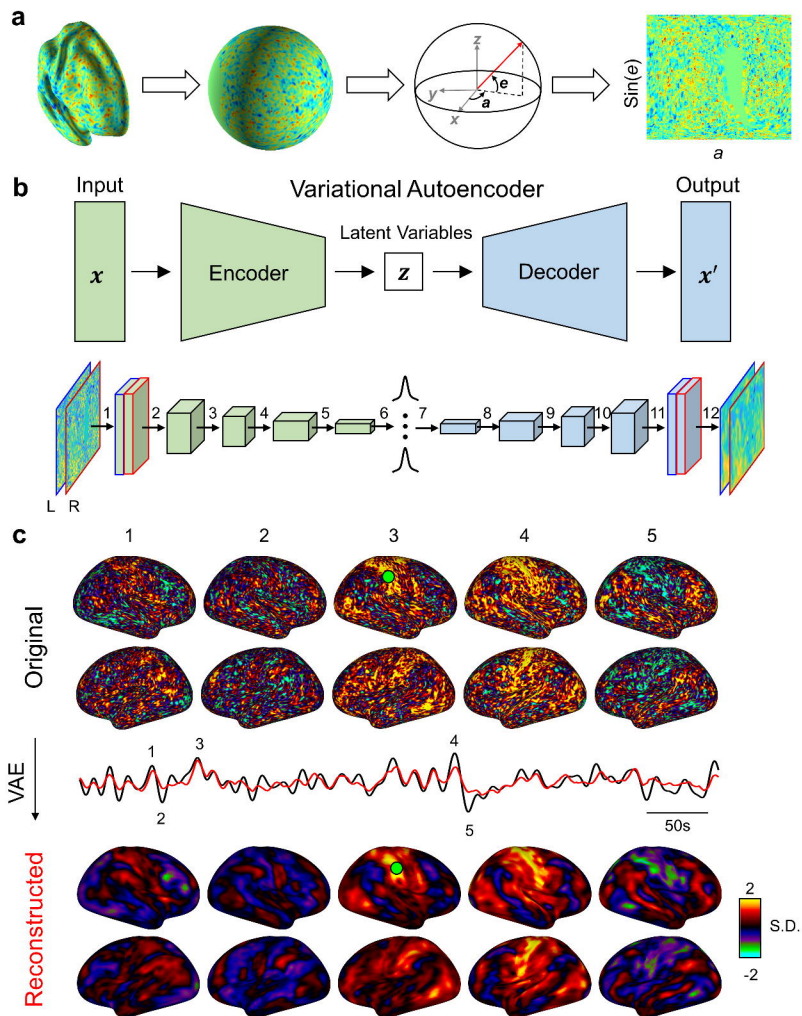



Visual

Dorsal Attention

Default Mode

Synthesized

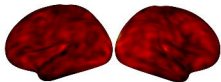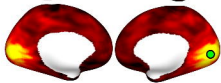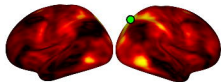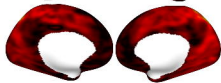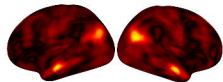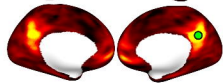

Measured

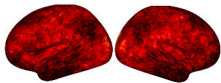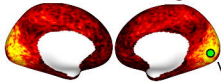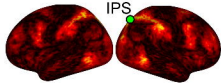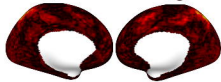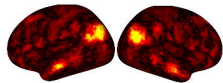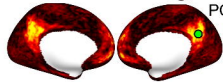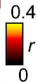

PCC

V1

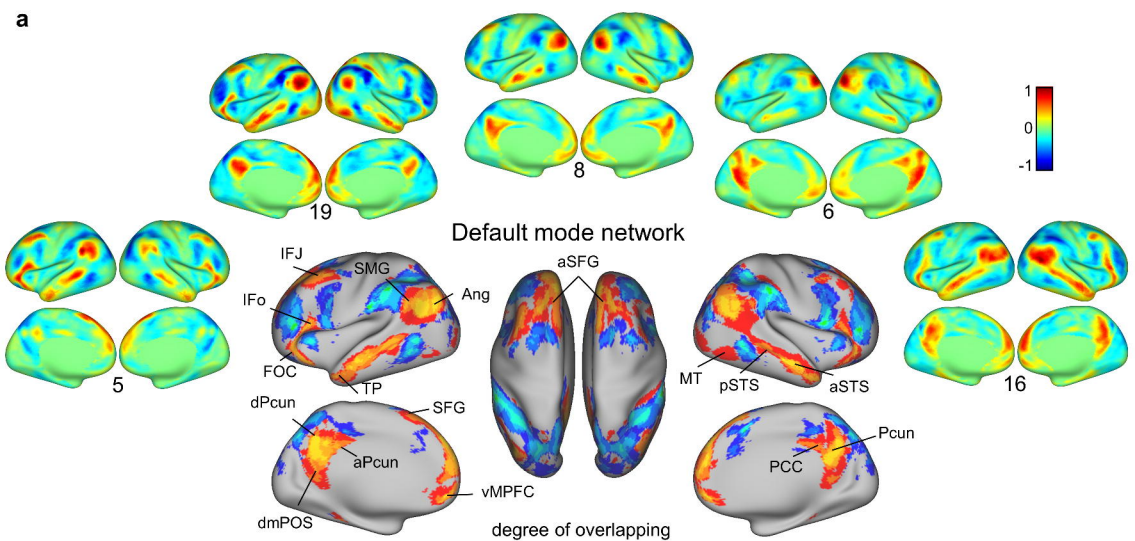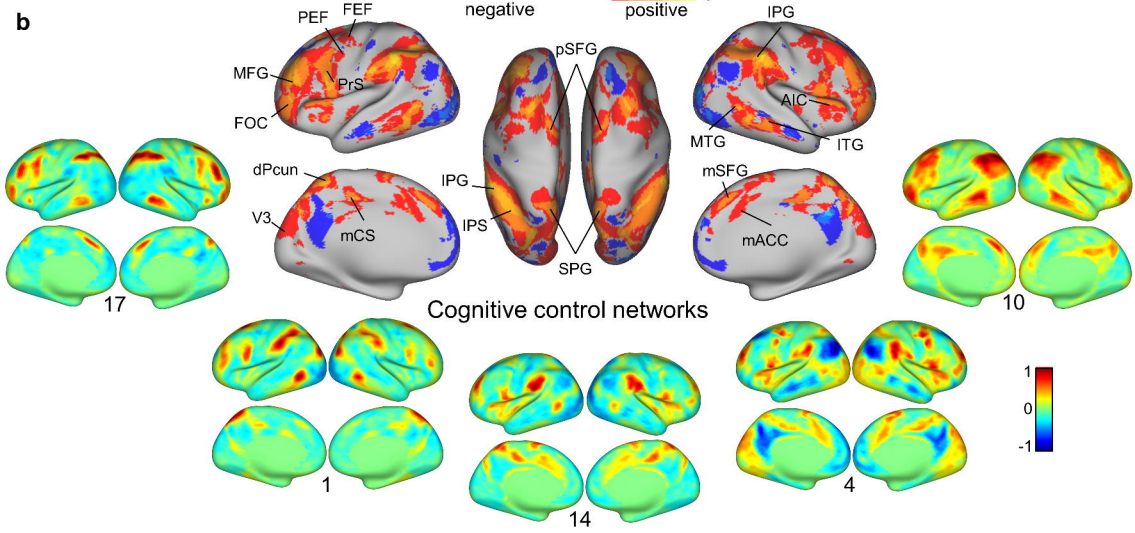

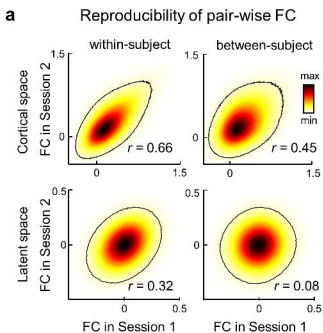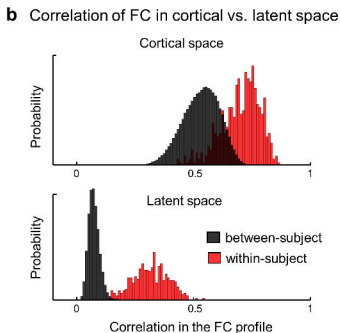

**c** Identification with FC in cortical space

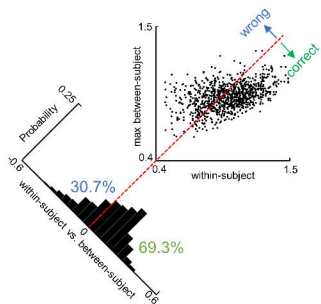

**d** Identification with FC in latent space

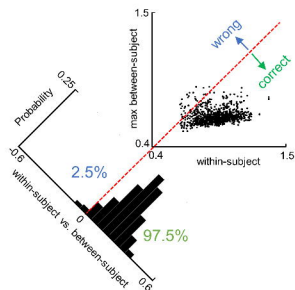

**e** Identification for more subjects

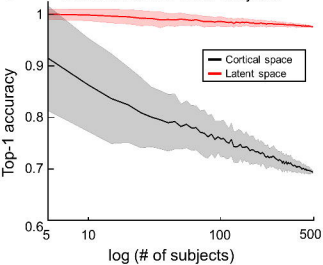

**f** Identification with fewer data

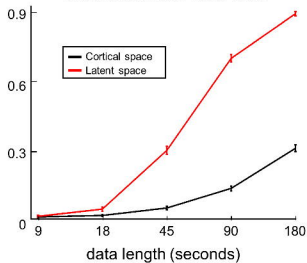

Source: https://www.biorxiv.org/content/10.1101/2020.06.16.155937v1.full.pdf
